# Supplementary material for: A high-performance X-ray detector based on large-size perovskite MAPbI3 single crystals grown by environmentally friendly solvents and advanced systems
Source: Royal Society of Chemistry journal article supplement (doi:10.1039/d4cc06301e), 2025-01-01
Supplement: d4cc06301e1.pdf [file d4cc06301e1.pdf]

**High-performance X-ray detector based on large-size perovskite  
MAPbI<sub>3</sub> single crystal grown by environmentally friendly  
solvents and advanced systems**

Xiangting Li<sup>a,b</sup>, Mengke Yang<sup>a,b</sup>, Zhuoyue Li<sup>a,c</sup>, Yundong Ma<sup>a,b</sup>, Yuanlong Sun<sup>a,b</sup>,

Min Zhang<sup>a,c</sup>, Guozong Zheng<sup>a,c</sup> and Ziyu Hu<sup>\*a,c</sup>

*Fujian Institute of Research on the Structure of Matter, Chinese Academy of Sciences,*

*Fuzhou 350002, China.*

*College of Chemistry and Materials Science, Fujian Normal University, Fuzhou*

*350007, China.*

*College of Chemistry, Fuzhou University, Fuzhou 350116, China*

*Fujian College, University of Chinese Academy of Sciences, Fuzhou 350002, China.*

Corresponding author: [huziyu@fjirsm.ac.cn](mailto:huziyu@fjirsm.ac.cn)

### Chemicals and reagents:

Chemical reagents lead iodide ( $\text{PbI}_2$ , 99%),  $\gamma$ -valerolactone (GVL, 98 %), and hydroiodic acid (HI) (57 wt% in water) were purchased from Adamas Reagent Co., Ltd Aladdin Reagent Co., Ltd., and methyl bromide ( $\text{CH}_3\text{NH}_2$ , 25 wt%) was purchased from Sinopharm Chemical Reagent Ltd., China, All chemicals were used as received without further purification.

### Synthesis of $\text{CH}_3\text{NH}_3\text{I}$

$\text{CH}_3\text{NH}_3\text{I}$  was synthesized by reacting  $\text{CH}_3\text{NH}_2$  and HI with the molar ratio of 2:1. The HI was added dropwise into the  $\text{CH}_3\text{NH}_2$  in a flask under a nitrogen atmosphere in an iced bath for 6 h, and the resulting solution was evaporated at 50 °C in a rotary evaporator for about 10 h to remove the solvent. The snow-white  $\text{CH}_3\text{NH}_3\text{I}$  crystalline powder was collected using Büchner funnel filtration after being washed three times with anhydrous ethanol and recrystallized in anhydrous diethyl ether, then dried in a vacuum oven at 60 °C overnight. The purity of the  $\text{CH}_3\text{NH}_3\text{I}$  powder was characterized using XRD (Figure S1 Supporting Information). The synthesized  $\text{CH}_3\text{NH}_3\text{I}$  product is shown in Figure S2.

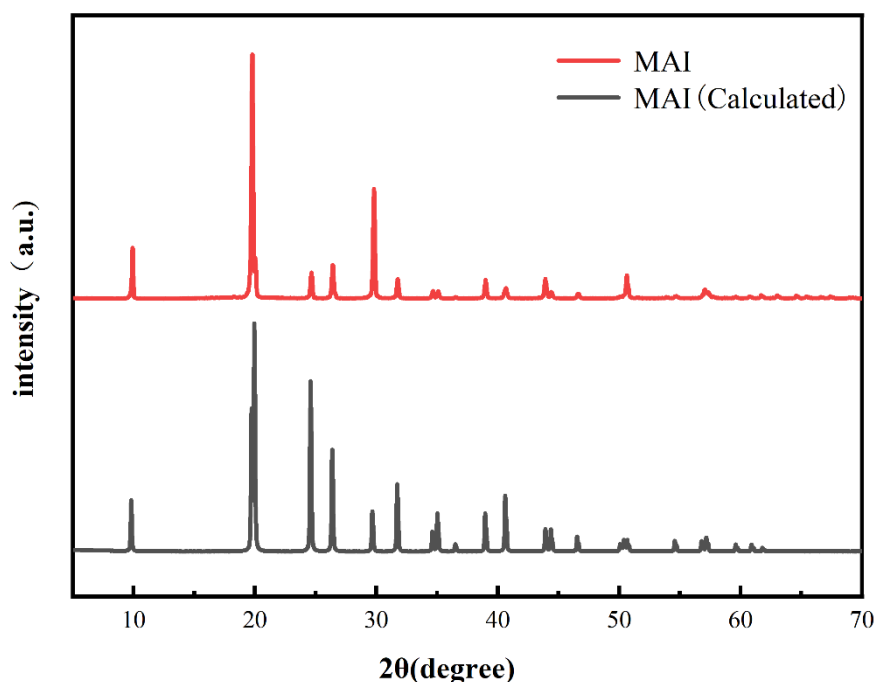

**Figure S1.** Powder XRD of  $\text{CH}_3\text{NH}_3\text{I}$

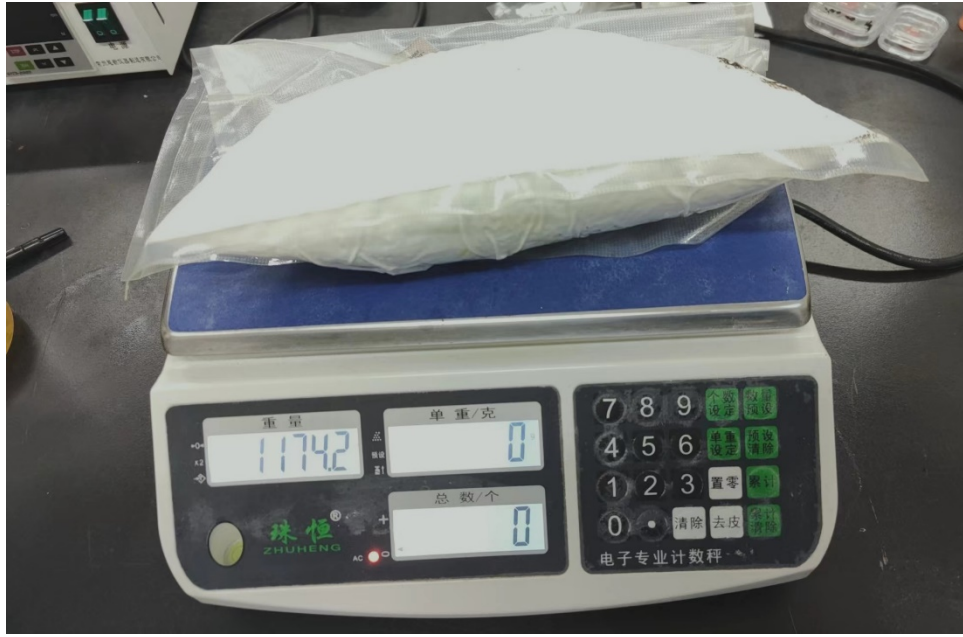

**Figure S2.** Product of  $\text{CH}_3\text{NH}_3\text{I}$

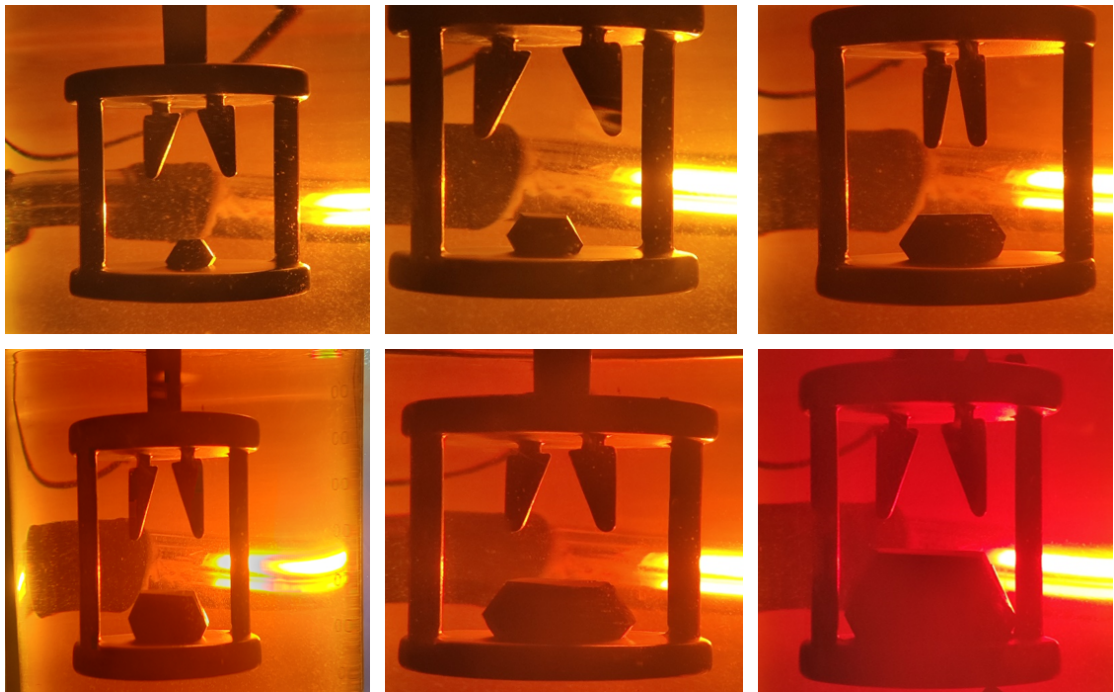

**Figure S3.** Evolution of the  $\text{MAPbI}_3$  crystals growth at different stages
